# Supplementary material
Source: Research Square preprint supplement (doi:10.21203/rs.3.rs-9802079/v1)
Supplement: Supplementary file 1 [file 11586c5249cbe38964eccbe5.pdf]

Online Resource 3

**Title:** Phase indicator of the gait cycle.

**Description:** The dynamic models are switched to generate a single output signal for a joint. Thus, a model switch indicator is built to show the current phase of the gait cycle; physically, this indicator is implemented in the exoskeleton with pressure sensors located at the ends of each foot.

**Article:** Dynamic modeling of human–exoskeleton interaction: A simulation framework for gait rehabilitation.

**Journal:** Multibody System Dynamics

**Authors:** Sergey González-Mejía and José Miguel Ramírez-Scarpetta

**Corresponding author:** Universidad del Valle, sergey.gonzalez@correounivalle.edu.co

| Left leg |     | Right leg |     | Phase of gait cycle                                                                                                                                                         |
|----------|-----|-----------|-----|-----------------------------------------------------------------------------------------------------------------------------------------------------------------------------|
| Heel     | Toe | Heel      | Toe |                                                                                                                                                                             |
| 1        | 1   |           |     | Model No. 1: double support with initial right-leg support<br>Note: If ( right toe(x) > left toe(x) )                                                                       |
| 1        | 0   | 1         | 1   |                                                                                                                                                                             |
| 0        | 1   |           |     |                                                                                                                                                                             |
| 1        | 1   |           |     | Model No. 1: double support with initial right-leg support<br>Note: If ( right toe(x) > left toe(x) )                                                                       |
| 1        | 0   | 1         | 0   |                                                                                                                                                                             |
| 0        | 1   |           |     |                                                                                                                                                                             |
| 1        | 1   |           |     | Model No. 1: double support with initial right-leg support<br>Note: If ( right toe(x) > left toe(x) )                                                                       |
| 1        | 0   | 0         | 1   |                                                                                                                                                                             |
| 0        | 1   |           |     |                                                                                                                                                                             |
| 0        | 0   | 1         | 1   | Model No. 2: right support with left swing<br>Note: Right foot fully supported on the ground                                                                                |
| 0        | 0   | 1         | 0   | Model No. 2: right support with left swing                                                                                                                                  |
| 0        | 0   | 0         | 1   | Model No. 2: right support with left swing                                                                                                                                  |
| 1        | 1   |           |     | Model No. 3: double support with initial left-leg support<br>Note: If ( left toe(x) > right toe(x) ) or<br>( left toe(x) == right toe(x) ) Initial position: standing state |
| 1        | 0   | 1         | 1   |                                                                                                                                                                             |
| 0        | 1   |           |     |                                                                                                                                                                             |
| 1        | 1   |           |     | Model No. 3: double support with initial left-leg support<br>Note: If ( left toe(x) > right toe(x) )                                                                        |
| 1        | 0   | 1         | 0   |                                                                                                                                                                             |
| 0        | 1   |           |     |                                                                                                                                                                             |
| 1        | 1   |           |     | Model No. 3: double support with initial left-leg support<br>Note: If ( left toe(x) > right toe(x) )                                                                        |
| 1        | 0   | 0         | 1   |                                                                                                                                                                             |
| 0        | 1   |           |     |                                                                                                                                                                             |
| 1        | 1   | 0         | 0   | Model No. 4: left support with right swing<br>Note: Left foot fully supported on the ground                                                                                 |
| 1        | 0   | 0         | 0   | Model No. 4: left support with right swing                                                                                                                                  |
| 0        | 1   | 0         | 0   | Model No. 4: left support with right swing                                                                                                                                  |
