# Supplementary material
Source: Research Square preprint supplement (doi:10.21203/rs.3.rs-9802079/v1)

## Online Resource 7

**Title:** Simulation framework for dynamic modeling of human-exoskeleton systems for gait rehabilitation.

**Description:** A simulation framework for human gait rehabilitation with lower-limb exoskeletons is developed to analyze Human-Robot Interaction and evaluate control strategies. The complete model is formulated as a hybrid dynamic system composed of four sub-models associated with the gait phases. These sub-models are synchronized according to the detected locomotion phase and include both actuator dynamics and low-level control loops. The framework was assembled in MATLAB/Simulink®.

**Article:** Dynamic modeling of human-exoskeleton interaction: A simulation framework for gait rehabilitation.

**Journal:** Multibody System Dynamics

**Authors:** Sergey González-Mejía and José Miguel Ramírez-Scarpetta

**Corresponding author:** Universidad del Valle, sergey.gonzalez@correounivalle.edu.co

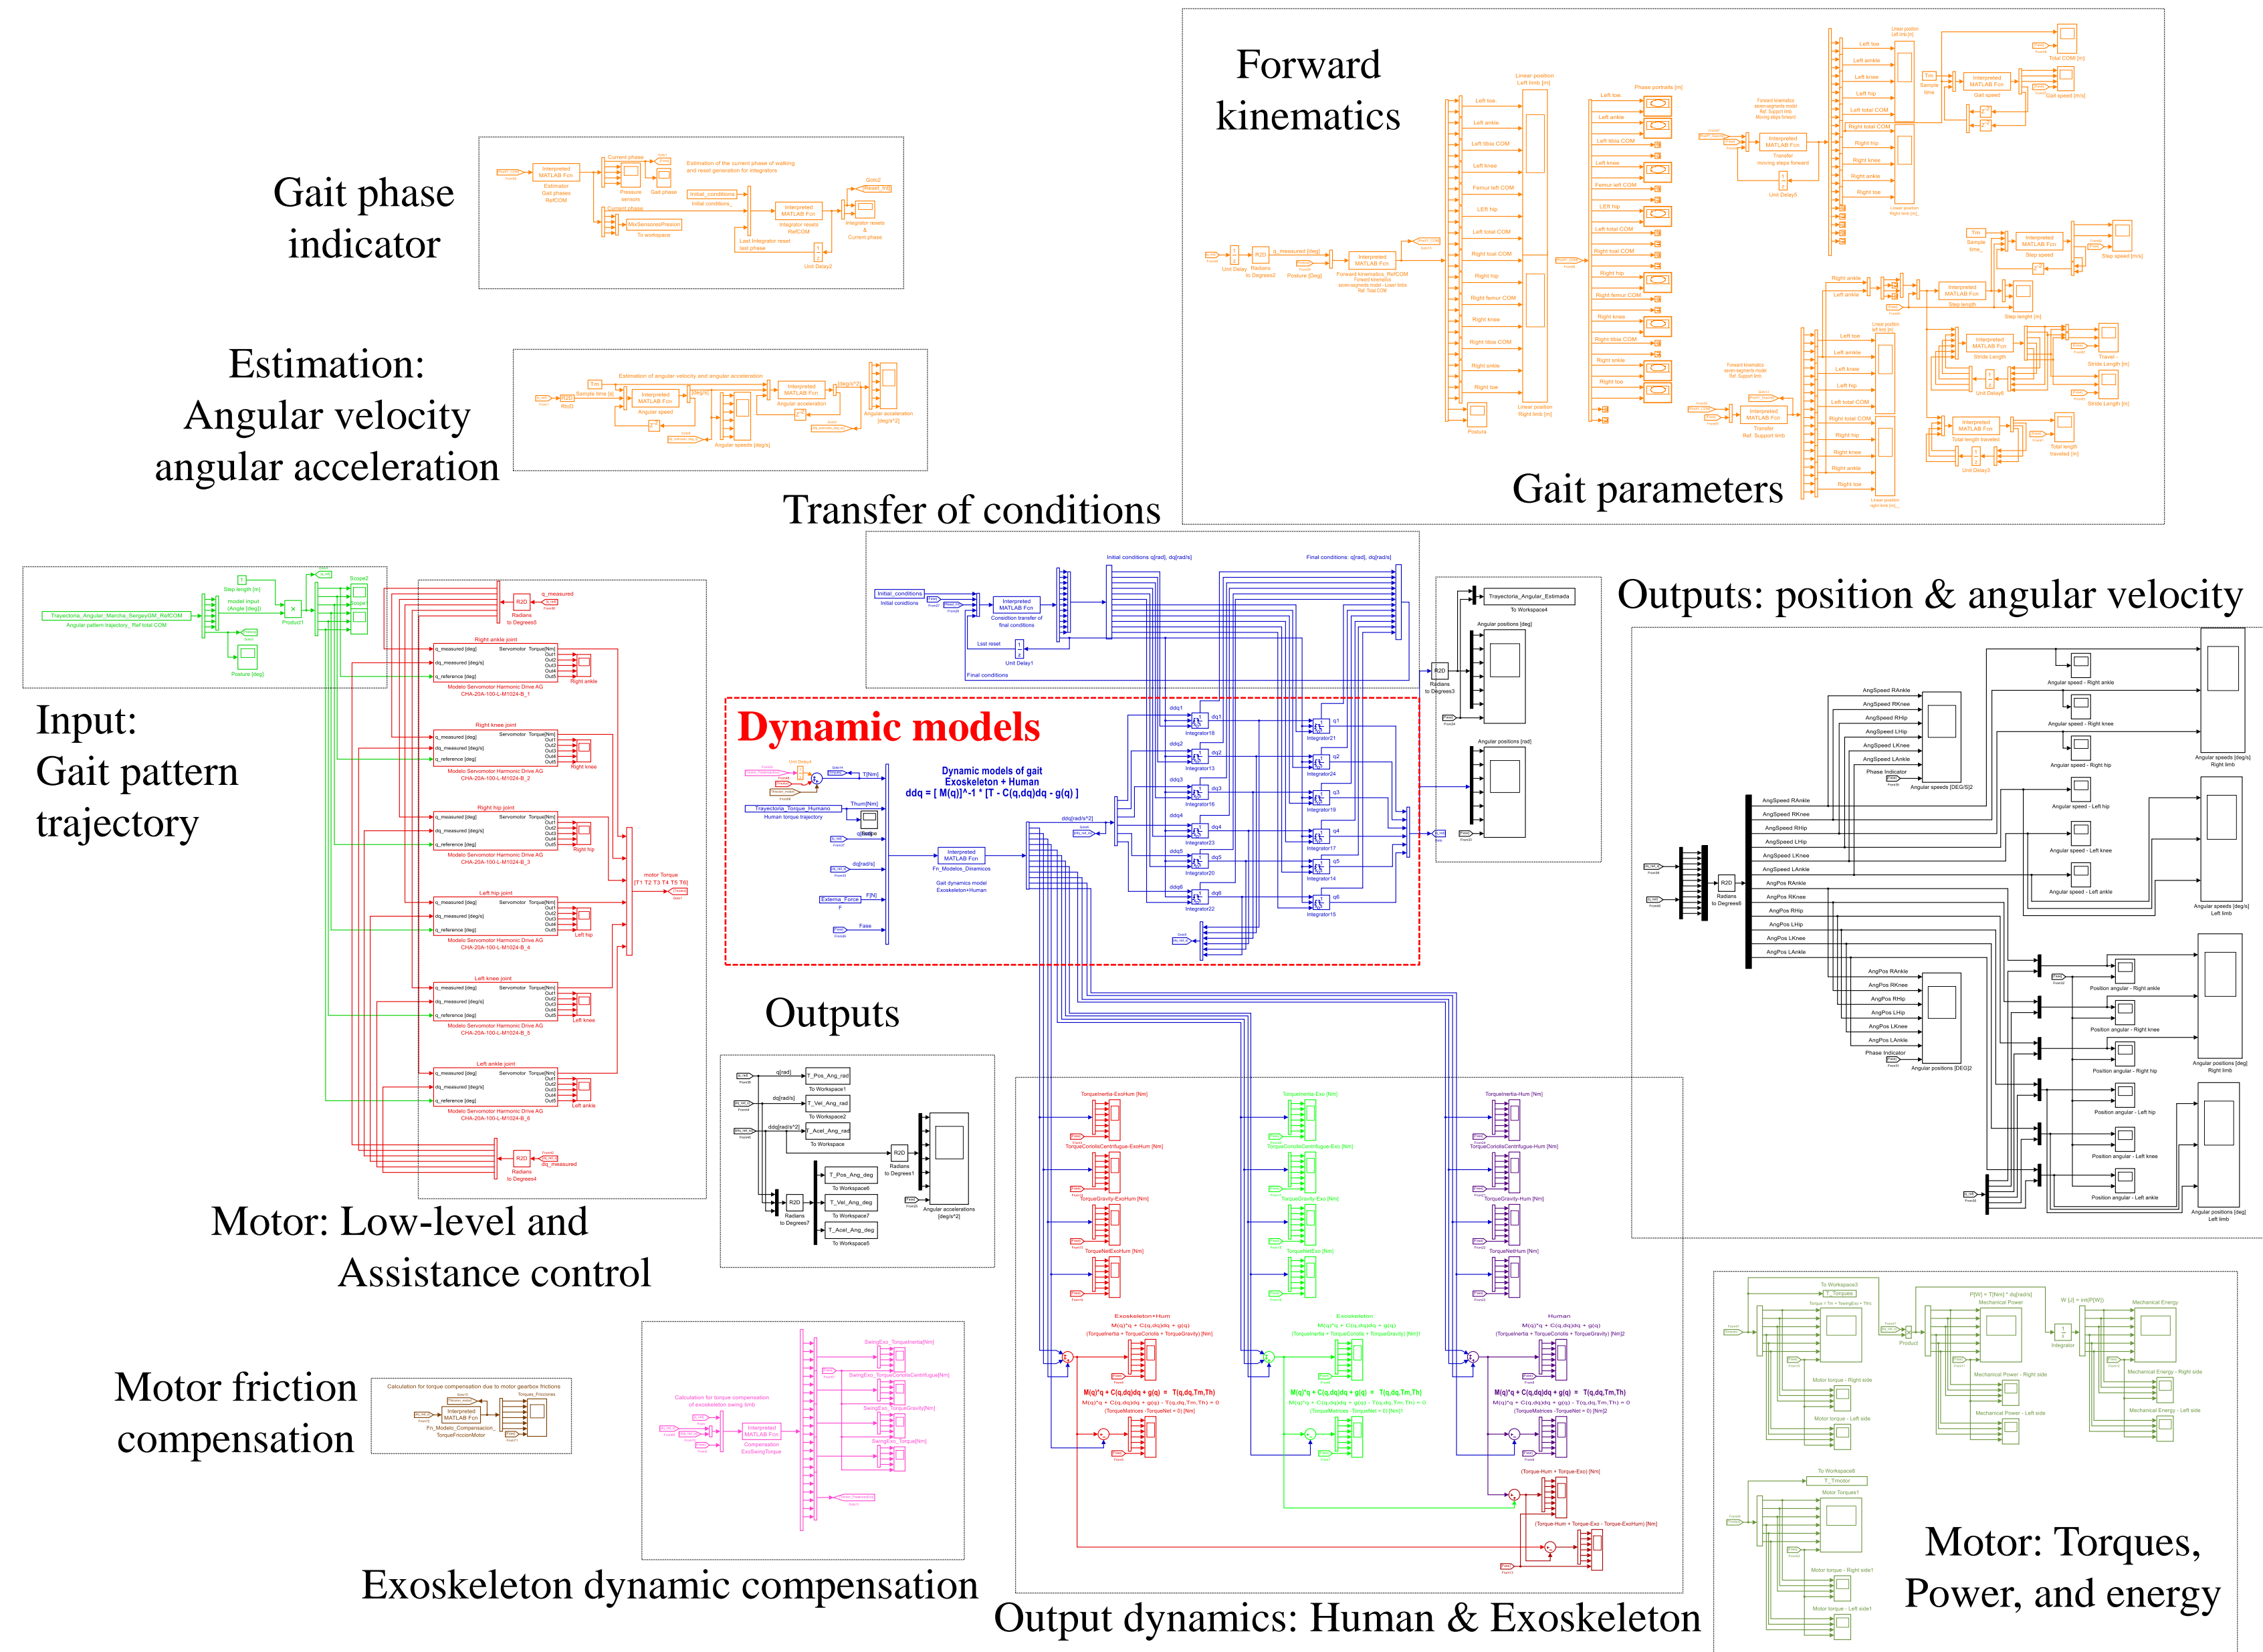

**Input:**  
Gait pattern trajectory

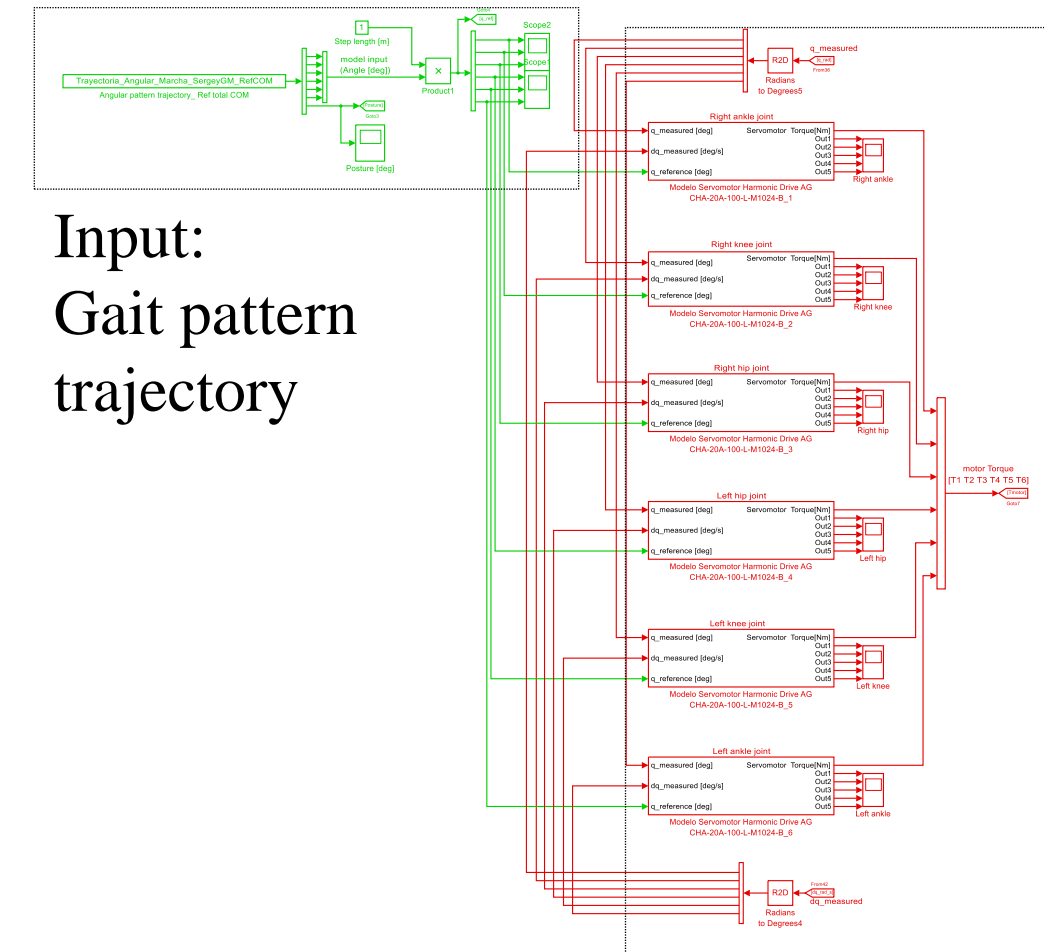

**Motor: Low-level and Assistance control**

**Motor friction compensation**

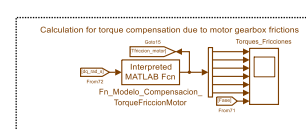

**Exoskeleton dynamic compensation**

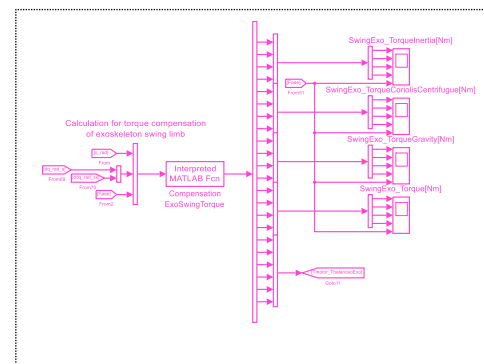

**Output dynamics: Human & Exoskeleton**

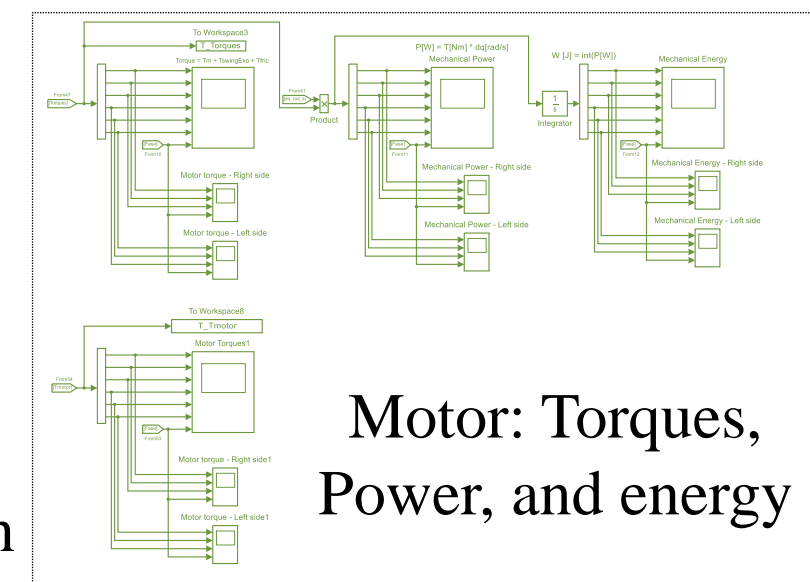

Supplement: Supplementary file 5 [file fcdcbcb3dce1919a3106eb33.pdf]
